# Supplementary material for: A prospective study of MRI biomarkers in the brain and lower limb muscles for prediction of lower limb motor recovery following stroke
Source: Front Neurol. 2023 Oct 24;14:1229681. doi: 10.3389/fneur.2023.1229681 (PMC10628497; doi:10.3389/fneur.2023.1229681)
Supplement: Supplementary file 1 [file Data_Sheet_1.XLSX]

## Sheet: 1. Demographics
	Gender	Age (years)	Affected leg	Dominant leg	Infarct location	Lower Limb Motor NIHSS	Lower Limb MRC Power	Baseline Functional Ambulation Category	Baseline Lower Limb Fugl-Meyer	No. days post stroke
BA1	Male	63	Right	Right	Basal Ganglia	2	4	2	29	17
BC2	Male	53	Right	Right	Frontal	1	4	5	31	8
BC3	Female	61	Left	Right	-	1	4	5	32	9
BC4	Female	81	Right	Right	Brainstem	2	4	2	26	20
BC5	Female	60	Right	Right	Basal Ganglia	1	1	5	33	16
AA2	Male	62	Left	Right	Parietal	2	5	2	21	14
AA3	Male	43	Left	Left	Frontal	1	4	5	33	10
AA5	Female	77	Left	Right	Frontal	1	4	3	34	21
BA5	Male	48	Left	Left	Parietal	1	3	2	28	15
AA7	Male	67	Left	Right	Frontal	1	5	5	34	28
AA9	Male	54	Right	Right	Frontal	1	2	2	20	2
AA12	Female	66	Left	Right	Brainstem	1	4	4	32	3
AA14	Male	64	Right	Right	Basal Ganglia	1	5	5	30	11
AA16	Female	55	Right	Right	Parietal	1	4	5	29	25
AA17	Male	79	Left	Right	Brainstem	0	4	5	31	22
BC8	Male	59	Right	Right	Parietal	1	4	4	34	19
BC9	Male	49	Right	Right	Brainstem	1	4	5	32	27
BC10	Male	59	Left	Right	Frontal	1	4	5	34	16
BA6	Male	68	Right	Right	Basal Ganglia	1	4	5	32	23
BC14	Male	78	Left	Right	Frontal	0	4	5	33	26
BA7	Male	80	Left	Right	Brainstem	1	4	3	31	27
AA21	Male	57	Right	Right	Frontal	1	4	5	33	6
AA22	Male	48	Left	Right	Basal Ganglia	2	4	5	33	11
BC16	Female	82	Right	Right	Brainstem	2	4	5	33	25
BC17	Female	71	Left	Right	Basal Ganglia	2	0	4	25	27
AA24	Female	84	Left	Right	Brainstem	0	4	4	32	19
AA26	Male	42	Right	Right	Temporal	1	4	5	32	16
AA28	Male	62	Left	Right	No infarct	1	4	5	33	16

## Sheet: 2. Brain biomarkers
	Unaffected Hemisphere					Affected Hemisphere
	Cerebral Peduncle FA	Posterior limb of internal capsule FA	Centrum Semiovale FA	Whole corticospinal tract FA	Whole corticospinal tract volume (mm^3)	Cerebral Peduncle FA	Posterior limb of internal capsule FA	Centrum Semiovale FA	Whole corticospinal tract FA	Whole corticospinal tract volume (mm^3)
BA1	0.69	0.63	0.43	0.53	15874.5	0.64	0.49	0.29	0.39	14141.7
BC2	0.66	0.64	0.33	0.5	19252.2	0.69	0.67	0.34	0.53	8213.56
BC3	-	-	-	-	-	-	-	-	-	-
BC4	0.62	0.6	0.28	0.47	16470.5	0.65	0.62	0.32	0.44	18571.7
BC5	0.62	0.58	0.29	0.49	11586.5	0.67	0.61	0.33	0.5	17566.3
AA2	0.74	0.69	0.43	0.55	20450	0.59	0.56	0.39	0.46	9958.11
AA3	-	-	-	-	-	-	-	-	-	-
AA5	0.69	0.68	0.59	0.55	14106.5	0.54	0.45	0.57	0.49	9461.84
BA5	0.75	0.71	0.34	0.52	20234.2	0.63	0.53	0.36	0.45	20927.5
AA7	0.76	0.7	0.42	0.6	9031.28	0.57	0.53	0.37	0.51	18567
AA9	0.6	0.6	0.32	0.51	7708.9	0.66	0.66	0.35	0.47	2939.2
AA12	0.73	0.6	0.39	0.47	6535.11	0.7	0.55	0.36	0.43	2594.88
AA14	0.71	0.53	0.26	0.42	7272.28	0.59	0.48	0.36	0.43	10055.3
AA16	-	-	-	-	-	-	-	-	-	-
AA17	0.68	0.6	0.31	0.51	13366.2	0.58	0.61	0.28	0.48	7752.49
BC8	0.63	0.48	0.31	0.4	8238.2	0.66	0.55	0.28	0.41	8634.74
BC9	0.71	0.71	0.38	0.47	10026.2	0.74	0.72	0.4	0.49	16343.8
BC10	0.58	0.62	0.45	0.5	14369.3	0.4	0.41	0.32	0.37	12118
BA6	0.59	0.53	0.33	0.46	6565.22	0.65	0.64	0.31	0.52	6615.66
BC14	0.62	0.6	0.4	0.5	11897.4	0.71	0.64	0.36	0.51	15708
BA7	0.7	0.64	0.37	0.49	24362.6	0.69	0.59	0.29	0.45	26798.2
AA21	0.73	0.66	0.31	0.49	15452.2	0.73	0.64	0.3	0.45	17330.5
AA22	0.76	0.67	0.34	0.52	16295.7	0.66	0.5	0.29	0.48	7168.24
BC16	0.6	0.59	0.29	0.5	16958.6	0.59	0.59	0.28	0.46	15395.9
BC17	0.67	0.7	0.35	0.52	20164.9	0.61	0.57	0.29	0.45	15587.1
AA24	0.74	0.63	0.41	0.51	17925.7	0.61	0.55	0.35	0.48	13409.9
AA26	0.63	0.67	0.36	0.46	20349.1	0.66	0.72	0.36	0.49	19254.5
Mean	0.675417	0.6275	0.362083	0.4975	14353.9	0.634167	0.578333	0.339583	0.464167	13129.8
Std Dev	0.0573715	0.0591784	0.0700583	0.0407482	5050.67	0.0704105	0.0781381	0.0599638	0.0391489	5813.01

## Sheet: 3. Lower limb biomarkers
	Unaffected Leg Vastus Lateralis							Affected Leg Vastus Lateralis
	Volume (mm^3)	Fat fraction (%)	IMCL	EMCL	IMCL/EMCL ratio	STIR	Mercuri	Volume (mm^3)	Fat fraction	IMCL	EMCL	IMCL/EMCL ratio	STIR	Mercuri
BA1	150190	74.73	-	-	-	0	1	136004	74.72	13.34	16.81	0.79	0	0
BC2	230218	4.77	20.81	42.79	0.486329	0	0	198928	4.79	28.54	31.07	1.5	0	0
BC3	86812.8	5.43	15.19	36.34	0.417997	0	0	87813.8	6.12	-	-	-	0	1
BC4	102972	5.86	-	-	-	0	0	96668.3	5.64	16.74	31.06	0.54	0	1
BC5	106264	5.3	-	-	-	0	0	100268	4.89	75.17	81.41	0.92	0	0
AA2	201450	69.44	-	-	-	0	0	187793	68.68	13.82	44.77	0.31	0	0
AA3	227994	4.56	-	-	-	0	1	230256	4.72	-	-	-	0	0
AA5	97476.7	4.94	17.86	51.43	0.347268	0	0	88256.5	5.29	22.03	48.9	0.45	0	1
BA5	307425	4.45	14.19	15.62	0.908451	0	0	264077	4.79	-	-	-	0	0
AA7	243365	6.6	19.81	42.97	0.461019	0	0	192316	4.91	5.34	15.96	0.33	0	1
AA9	-	-	-	-	-	0	0	-	-	19.84	38.55	0.51	0	0
AA12	-	-	-	-	-	0	0	-	-	-	-	-	0	0
AA14	108487	4.22	-	-	-	0	1	123934	3.83	-	-	-	0	0
AA16	-	-	-	-	-	-	-	-	-	-	-	-	-	-
AA17	152923	5.57	-	-	-	0	0	122626	5.51	14.73	43.81	0.34	0	0
BC8	153501	6.55	19.2	84.83	0.226335	0	1	215588	6.07	25.16	25.78	0.98	0	0
BC9	175936	6.78	22.06	34.33	0.642587	0	0	205752	5.58	12.97	99.44	0.13	0	0
BC10	284586	4.38	28.85	39.65	0.727617	0	0	238851	4.55	8.77	9.55	0.92	0	0
BA6	239977	3.6	13.9	41.97	0.331189	0	0	271391	3.67	10.84	33.36	0.32	0	0
BC14	132818	5.91	17.29	47.9	0.36096	0	0	145436	5.11	18.39	67.92	0.27	0	1
BA7	179073	4.63	9.18	13.92	0.659483	0	0	137341	4.94	14.75	22.58	0.65	0	1
AA21	292334	2.56	11.21	12.27	0.91361	0	0	278051	1.87	9.29	10.73	0.87	0	0
AA22	194222	4.94	-	-	-	0	0	150373	4.83	-	-	-	0	0
BC16	108949	5.82	12.19	99.05	0.123069	0	0	113694	5.24	19.99	68.8	0.29	0	0
BC17	108064	4.97	14.26	44.34	0.321606	0	0	99574.9	5.2	9.59	20.73	0.46	0	0
AA24	-	-	-	-	-	0	0	63483.1	11.65	-	-	-	0	2
AA26	219111	4.3	13.24	41.07	0.322376	0	0	223317	5.2	28.48	67.47	0.42	0	0
Mean	178441	10.883	16.616	43.232	0.483326	0	0.153846	165491	10.7417	19.3568	40.9842	0.578947	0	0.307692
Std Dev	66311.8	18.9276	4.84514	22.6018	0.229672	0	0.360801	63662.4	18.4685	14.618	24.8067	0.33066	0	0.538462

## Sheet: 4. Clinical Recovery
	Clinical Scores			Dynamometry
	Fugl Meyer Recovery	NIHSS Recovery	Functional Ambulation Category Recovery	Ankle Plantarflexion Recovery	Ankle Dorsiflexion Recovery	Hip Abduction Recovery	Hip Adduction Recovery	Hip Extension Recovery	Hip Flexion Recovery	Knee Extension Recovery	Knee Flexion Recovery
BA1	2	-1	3	-0.11	-0.09	0.09	0.08	0.16	0.03	0.15	-0.08
BC2	3	0	0	-0.33	0.43	0.22	-0.25	-0.14	0.35	0.19	0.2
BC3	-	-	-	-	-	-	-	-	-	-	-
BC4	7	-2	2	0.18	0.42	0.18	0.29	0.14	0.12	-0.01	0.2
BC5	0	-1	0	0.01	0.19	0.15	0.07	-0.2	-0.31	0	0.09
AA2	-	-	-	-	-	-	-	-	-	-	-
AA3	1	-1	0	0.29	0.18	0.34	0.41	0.06	0.21	0.15	0.04
AA5	-	-	2	-	-	-	-	-	-	-	-
BA5	3	-1	3	0.32	0.85	0.13	0.2	-0.31	-0.19	-0.28	0.21
AA7	0	0	0	-0.24	0.19	0.08	-0.06	-0.27	-0.02	-0.01	-0.05
AA9	12	-1	3	0.47	0.88	1.22	0.73	0.53	0.19	0.4	0.66
AA12	2	-1	1	-	-	-	-	-	-	-	-
AA14	3	-1	0	0.27	0.25	0.1	0.64	-0.03	0.29	0.07	0.02
AA16	2	0	0	-0.13	-0.07	0.27	-0.02	-0.24	-0.2	0.04	0.02
AA17	2	0	0	-0.38	0.34	-0.18	-0.06	-0.13	0.01	-0.09	0.09
BC8	0	0	1	-0.21	-0.66	0.3	-0.16	0.05	0.15	0	0.3
BC9	2	-1	0	-0.06	0	-0.16	-0.11	-0.02	0.08	0.47	-0.07
BC10	2	-1	0	-0.17	0.22	0.04	0.17	-0.46	0.01	-0.15	0.51
BA6	-1	-1	0	0.04	-0.18	-0.58	0.2	-0.09	0.15	0.14	-0.43
BC14	1	0	0	-0.29	0.07	0.22	0.4	-0.39	0.12	-0.03	-0.07
BA7	0	0	2	0.08	0.62	-0.21	-	-	-	-	-
AA21	-1	0	0	0.34	0.57	0.31	0.39	-0.65	0.15	-0.25	0.12
AA22	1	0	0	-0.24	0	0.2	0	0.04	0.19	0.17	-0.06
BC16	1	0	0	0.11	0.17	0.43	0.4	0.44	-0.46	0.15	0.18
BC17	-1	-1	0	-0.19	-0.35	0.4	0.26	0.48	-0.1	0.11	-0.01
AA24	2	-2	1	-0.23	0.08	-0.28	-0.07	-0.23	0.03	-0.02	0.14
AA26	2	0	0	-0.22	-0.25	-0.02	-0.28	-0.11	-0.07	0.15	0.13

## Sheet: 5. Brain MR vs Recovery
Correlations
			Cerebral Peduncle FA	Posterior Limb of Internal Capsule FA	Centrum Semiovale FA	Whole corticospinal tract FA	Whole corticospinal tract volume (mm^3)
Spearman's Rho	Fugl Meyer Recovery	Correlation Coefficient	-0.0924022	-0.0531313	.457*	0.020213	-0.287602
		Sig. (1-tailed)	0.341276	0.407172	0.0162895	0.464429	0.0971684
		N	22	22	22	22	22
	NIHSS Recovery	Correlation Coefficient	0.123187	0.134038	-0.121911	0.202972	0.183185
		Sig. (1-tailed)	0.292478	0.276025	0.294441	0.182486	0.20725
		N	22	22	22	22	22
	Functional Ambulation Category Recovery	Correlation Coefficient	-0.0704142	-0.179697	0.00225326	-.359*	-0.242788
		Sig. (1-tailed)	0.374765	0.20598	0.495929	0.046063	0.132159
		N	23	23	23	23	23
	Ankle Plantarflexion Recovery	Correlation Coefficient	0.1	0.0012987	.457*	-0.180519	0.248052
		Sig. (1-tailed)	0.333132	0.497771	0.0186042	0.216797	0.139145
		N	21	21	21	21	21
	Ankle Dorsiflexion Recovery	Correlation Coefficient	-0.105195	-0.145455	.406*	-0.219481	-0.0311688
		Sig. (1-tailed)	0.324984	0.264641	0.0337291	0.169555	0.446654
		N	21	21	21	21	21
	Hip Abduction Recovery	Correlation Coefficient	0.271429	0.11039	0.236364	-0.131169	-0.168831
		Sig. (1-tailed)	0.116987	0.316911	0.151144	0.285445	0.232211
		N	21	21	21	21	21
	Hip Adduction Recovery	Correlation Coefficient	0.0781955	-0.0586466	0.267669	-0.335338	0.0556391
		Sig. (1-tailed)	0.371575	0.402996	0.126946	0.0741786	0.407887
		N	20	20	20	20	20
	Hip Extension Recovery	Correlation Coefficient	0.22406	0.237594	0.0330827	-0.0315789	-0.288722
		Sig. (1-tailed)	0.171143	0.156565	0.444938	0.447427	0.108496
		N	20	20	20	20	20
	Hip Flexion Recovery	Correlation Coefficient	0.249624	0.284211	0.178947	0.359398	-0.18797
		Sig. (1-tailed)	0.144256	0.112292	0.225163	0.0598163	0.213711
		N	20	20	20	20	20
	Knee Extension Recovery	Correlation Coefficient	.423*	0.318797	0.132331	0.287218	-0.254135
		Sig. (1-tailed)	0.0317204	0.0853489	0.289054	0.109752	0.139799
		N	20	20	20	20	20
	Knee Flexion Recovery	Correlation Coefficient	-0.081203	0.043609	0.209023	-0.0661654	-0.344361
		Sig. (1-tailed)	0.366804	0.427574	0.188236	0.390832	0.0685363
		N	20	20	20	20	20
**. Correlation is significant at the 0.01 level (1-tailed).
*. Correlation is significant at the 0.05 level (1-tailed).

## Sheet: 6. Leg MR vs Recovery
Correlations
			Vastus Lateralis Volume (mm^3)	Vastus Lateralis Fat Fraction (%)	Vastus Lateralis IMCL	Vastus Lateralis EMCL	Vastus Lateralis IMCL/EMCL ratio	STIR	Mercuri
Spearman's Rho	Fugl Meyer Recovery	Correlation Coefficient	-0.0635636	0.163121	0.151724	0.164624	0.182518		-0.038073
		Sig. (1-tailed)	0.395031	0.245994	0.310368	0.304579	0.285098		0.431534
		N	20	20	13	12	12	23	23
	NIHSS Recovery	Correlation Coefficient	-0.0656605	-0.401	0.44699	0.413919	-0.177394		-0.159515
		Sig. (1-tailed)	0.391646	0.0398395	0.0628394	0.0905075	0.290626		0.233607
		N	20	20	13	12	12	23	23
	Functional Ambulation Category Recovery	Correlation Coefficient	-0.224424	.377*	0.367763	0.108023	0.20487		0.147377
		Sig. (1-tailed)	0.164033	0.0460114	0.0978911	0.362694	0.250976		0.245971
		N	21	21	14	13	13	24	24
	Ankle Plantarflexion Recovery	Correlation Coefficient	0.240602	-0.0105263	-0.142857	0.146853	-0.153846		-0.250752
		Sig. (1-tailed)	0.153431	0.482434	0.320758	0.324398	0.316545		0.130172
		N	20	20	13	12	12	22	22
	Ankle Dorsiflexion Recovery	Correlation Coefficient	-.456*	-0.0165414	-0.0549451	0.0979021	-0.181818		0.236077
		Sig. (1-tailed)	0.0217467	0.472409	0.429252	0.381061	0.285851		0.145094
		N	20	20	13	12	12	22	22
	Hip Abduction Recovery	Correlation Coefficient	0.201504	-0.234586	-0.021978	-0.447552	0.468531		-0.3069
		Sig. (1-tailed)	0.19713	0.159738	0.471593	0.0722932	0.0622274		0.0823767
		N	20	20	13	12	12	22	22
	Hip Adduction Recovery	Correlation Coefficient	0.229825	-0.154386	-0.321678	-0.0454545	-0.209091		-0.131568
		Sig. (1-tailed)	0.17194	0.263998	0.153955	0.447213	0.26861		0.284854
		N	19	19	12	11	11	21	21
	Hip Extension Recovery	Correlation Coefficient	0.221053	0.15614	0.041958	-0.0727273	0.409091		-.386*
		Sig. (1-tailed)	0.181555	0.26163	0.448493	0.415858	0.105773		0.0417608
		N	19	19	12	11	11	21	21
	Hip Flexion Recovery	Correlation Coefficient	0.194737	-0.154386	-0.118881	0.118182	0.0545455		-0.280329
		Sig. (1-tailed)	0.212173	0.263998	0.356442	0.364642	0.436723		0.109193
		N	19	19	12	11	11	21	21
	Knee Extension Recovery	Correlation Coefficient	0.208772	0.0912281	0.27972	0.427273	0.236364		-0.319201
		Sig. (1-tailed)	0.195517	0.355157	0.189284	0.0949719	0.242046		0.0792095
		N	19	19	12	11	11	21	21
	Knee Flexion Recovery	Correlation Coefficient	-0.131579	0.252632	0.342657	-.591*	.709**		0.0373772
		Sig. (1-tailed)	0.295652	0.148362	0.137784	0.0277878	0.00727603		0.436105
		N	19	19	12	11	11	21	21
*. Correlation is significant at the 0.05 level (1-tailed).
**. Correlation is significant at the 0.01 level (1-tailed).

## Sheet: 7. Brain MR vs Leg MR
Correlations
			Centrum Semiovale FA	Posterior Limb of Internal Capsule FA	Cerebral Peduncle FA	Whole corticospinal tract FA	Whole corticospinal tract volume (mm^3)
Spearman's Rho	Vastus Lateralis Volume (mm^3)	Correlation Coefficient	.426*	.599**	.545**	.578**	.416*
		Sig. (1-tailed)	0.0270893	0.00206867	0.00527188	0.00303561	0.0304927
		N	21	21	21	21	21
	Vastus Lateralis Fat Fraction (%)	Correlation Coefficient	-0.162338	-0.190909	-0.142857	-0.144156	-.556**
		Sig. (1-tailed)	0.24101	0.203566	0.26837	0.266503	0.00444436
		N	21	21	21	21	21
	Vastus Lateralis IMCL	Correlation Coefficient	0.269231	0.379121	0.406593	0.461538	-0.335165
		Sig. (1-tailed)	0.186867	0.100703	0.0839892	0.056188	0.131472
		N	13	13	13	13	13
	Vastus Lateralis EMCL	Correlation Coefficient	.577*	0.230769	.484*	0.423077	0.269231
		Sig. (1-tailed)	0.0194963	0.224064	0.0470673	0.0748743	0.186867
		N	13	13	13	13	13
	Vastus Lateralis IMCL/EMCL ratio	Correlation Coefficient	-0.0274725	0.137363	0.00549451	0.159341	-.797**
		Sig. (1-tailed)	0.464506	0.327258	0.492893	0.301544	0.000556826
		N	13	13	13	13	13
	STIR	Correlation Coefficient
		Sig. (1-tailed)
		N	24	24	24	24	24
	Mercuri	Correlation Coefficient	-0.0734903	-0.175169	-0.110739	-0.0966448	0.092618
		Sig. (1-tailed)	0.36645	0.20648	0.303229	0.326629	0.333438
		N	24	24	24	24	24
*. Correlation is significant at the 0.05 level (1-tailed).
**. Correlation is significant at the 0.01 level (1-tailed).
